# Supplementary material for: Addressing the contribution of previously described genetic and epidemiological risk factors associated with increased prostate cancer risk and aggressive disease within men from South Africa
Source: PubMed Central journal article supplement (PMC3882498; doi:10.1186/1471-2490-13-74), 2013-12-29
Supplement: 1471-2490-13-74-S2.pdf [file 1471-2490-13-74-S2.pdf]

A.

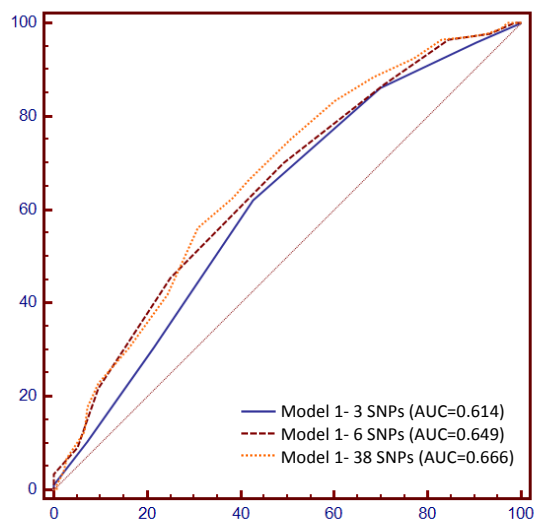

B.

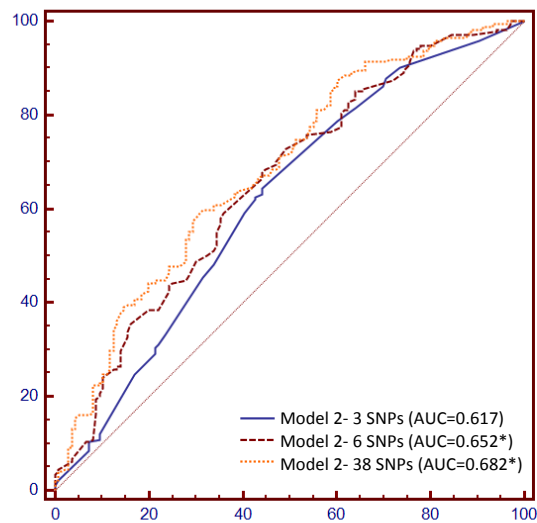

C.

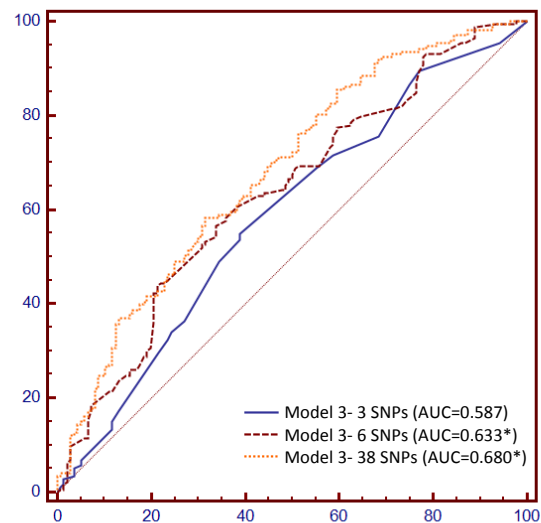

D.

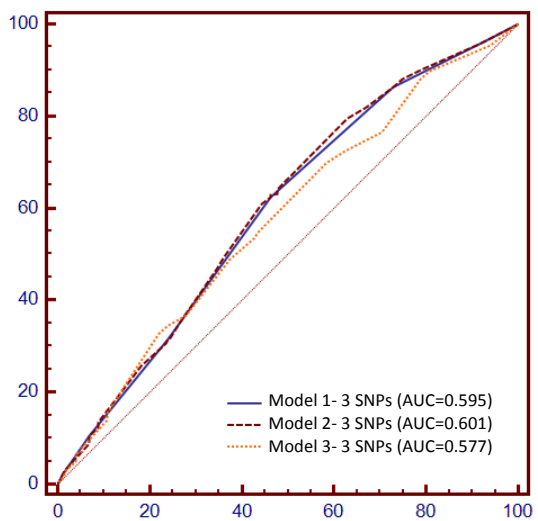

E.

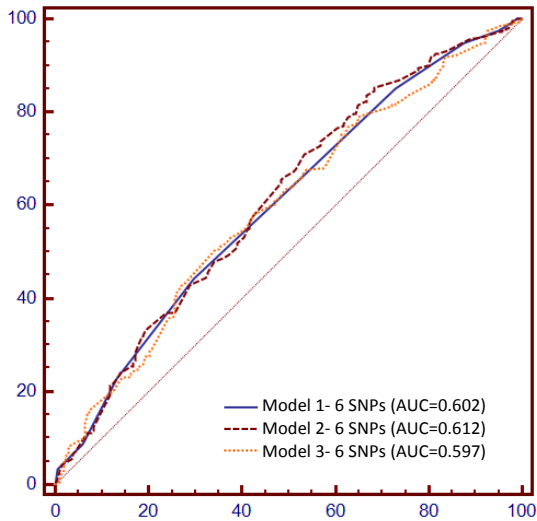

F.

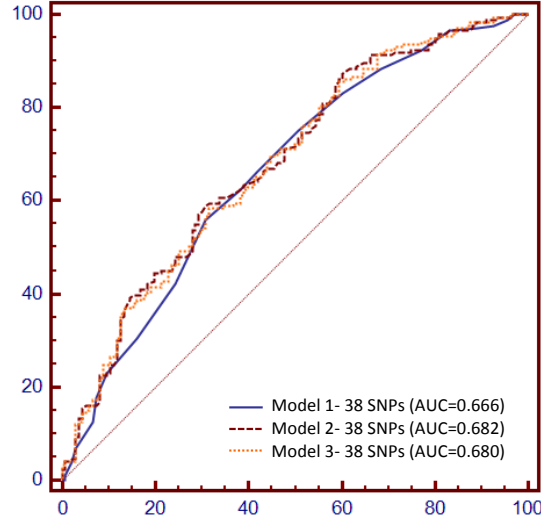

**Figure S1. Genetic risk models 1-3 for 3, 6 and 38 SNPs.** (a) Genetic risk Model 1: Count GRS (cGRS) is defined as the total sum of risk alleles present at each SNP ( $cGRS = \sum \text{risk alleles}$ ). (b) Genetic risk Model 2: weighted GRS (wGRS) considers both the number of risk alleles and the OR attributed to that SNP ( $wGRS = \sum \text{OR} \times \text{risk alleles}$ ). (c) Genetic risk Model 3: Risk relative to the average population is defined as the genotypic risk ( $OR^n \times \text{risk alleles}$ ) divided by the average population risk ( $\sum \text{population frequency} \times \text{genotypic risk}$ ) and calculated for each genotype combination. All models were calculated using 38 SNPs (d), 6 SNPs that reached statistical significance in stage 1 (e) and 3 SNPs significant in stage 2 (f). Population specific study ORs and allele frequencies were used to calculate GRSs. For genetic risk Models 2 and 3 (b) and (c) the 6 SNP and 38 SNP combinations significantly improved predictive power compared to 3 SNPs only. For Model 2 the difference between AUC=0.035 (95%CI 0.005-0.065, P=0.0208) and 0.065 (95%CI 0.015-0.116, P=0.0117) for 6 and 38 SNPs respectively. For Model 3, the difference between AUC=0.047 (95%CI 0.005-0.088, P=0.0282) and 0.093 (95%CI 0.027-0.159, P=0.0061) for 6 and 38 SNPs respectively. There was no significant difference within each model for any of the  $n$  SNP combinations (d) to (f).
